# Supplementary material for: Entropy production and non-Markovian dynamical maps
Source: Springer Nature journal article supplement (doi:10.1038/s41598-017-12595-x), 2017-09-25
Supplement: MOESM1 [file 41598_2017_12595_MOESM1_ESM.pdf]

# Entropy production and non-Markovian dynamical maps

S. Marcantoni<sup>1,2</sup>, S. Alipour<sup>3</sup>, F. Benatti<sup>1,2,\*</sup>, R. Floreanini<sup>2</sup>, and A. T. Rezakhani<sup>4</sup>

<sup>1</sup>Department of Physics, University of Trieste, I-34151 Trieste, Italy

<sup>2</sup>National Institute for Nuclear Physics (INFN), Trieste Section, I-34151 Trieste, Italy

<sup>3</sup>School of Nano Science, Institute for Research in Fundamental Sciences (IPM), Tehran 19538, Iran

<sup>4</sup>Department of Physics, Sharif University of Technology, Tehran 14588, Iran

\*benatti@ts.infn.it

## ABSTRACT

Here we present some further details related to Example I.

## Supplementary Information: Sign of the entropy production in Example I

From Eq. (18) in the main text it seems that the sign of  $\sigma_\tau$  depends both on  $\gamma_\tau$  and on the sign of the expression within the square brackets. In this section we prove that the latter is always positive. Let us rewrite the entropy production in a more convenient way as

$$\sigma_\tau = \gamma_\tau \coth(\beta\omega/2) e^{-2\Gamma\tau} [A + B + C],$$

where

$$A = \frac{x_0^2 + y_0^2}{4r_\tau} \log\left(\frac{1+r_\tau}{1-r_\tau}\right), \quad B = \frac{z_0 + |z_\infty|}{2} \log\left(\frac{1+r_\infty}{1-r_\infty}\right), \quad C = \frac{(z_0 + |z_\infty|)z_\tau}{2r_\tau} \log\left(\frac{1+r_\tau}{1-r_\tau}\right).$$

Note that  $A$  is always nonnegative whereas  $B$  and  $C$  can be either positive or negative. We show in the following that  $A + B + C$  is nevertheless positive, distinguishing different situations.

1. If  $z_0 + |z_\infty| \leq 0$ , then  $z_\tau \leq -|z_\infty|$ , because  $z_\tau + |z_\infty| = e^{-2\Gamma\tau}(z_0 + |z_\infty|)$  and

$$|r_\tau| \geq |z_\tau| \geq |z_\infty| = r_\infty.$$

Hence  $B + C \geq 0$ , because

$$r_\tau \log\left(\frac{1+r_\infty}{1-r_\infty}\right) - |z_\tau| \log\left(\frac{1+r_\tau}{1-r_\tau}\right) \leq r_\tau \log\left(\frac{1+r_\infty}{1-r_\infty}\right) - r_\infty \log\left(\frac{1+r_\tau}{1-r_\tau}\right) \leq 0,$$

where the last inequality holds because the function

$$f(x) = \frac{1}{x} \log\left(\frac{1+x}{1-x}\right),$$

is monotonically increasing for  $0 < x < 1$ . This can be seen from the first derivative,

$$f'(x) = \frac{1}{x^2} \left[ \frac{2x}{1-x^2} - \log\left(\frac{1+x}{1-x}\right) \right],$$

which is always positive because

$$\frac{2x}{1-x^2} - |\log(1+x)| - |\log(1-x)| \geq \frac{2x}{1-x^2} - \frac{x}{2} \frac{2+x}{1+x} - \frac{x}{2} \frac{2-x}{1-x} = \frac{x^3}{1-x^2} \geq 0,$$

in which the following inequalities have been used<sup>1</sup>:

$$\frac{2x}{2+x} \leq |\log(1+x)| \leq \frac{x}{2} \frac{2+x}{1+x}, \quad \frac{2x}{2-x} \leq |\log(1-x)| \leq \frac{x}{2} \frac{2-x}{1-x}.$$

2. In the case  $z_0 + |z_\infty| \geq 0$ , we need to distinguish different situations.

- First, if  $z_\tau \geq 0$ , then  $B$  and  $C$  are both positive.
- If instead  $-|z_\infty| \leq z_\tau \leq 0$  and  $r_\tau \leq r_\infty$ , then  $B + C$  is positive because

$$\log\left(\frac{1+r_\infty}{1-r_\infty}\right) - \frac{|z_\tau|}{r_\tau} \log\left(\frac{1+r_\tau}{1-r_\tau}\right) \geq \log\left(\frac{1+r_\infty}{1-r_\infty}\right) - \log\left(\frac{1+r_\tau}{1-r_\tau}\right) \geq 0.$$

- The last possibility is  $-|z_\infty| \leq z_\tau \leq 0$  and  $r_\tau \geq r_\infty$ . In this case,  $B$  is positive and the following inequality holds:

$$x_0^2 + y_0^2 \geq (|z_\infty| - z_\tau)(z_0 + |z_\infty|) \geq 0.$$

As a consequence,  $A + C \geq 0$ ,

$$x_0^2 + y_0^2 - 2|z_\tau|(z_0 + |z_\infty|) \geq x_0^2 + y_0^2 - (|z_\infty| + |z_\tau|)(z_0 + |z_\infty|) \geq 0.$$

Summarizing, the expression in the square brackets  $[A + B + C]$  is always nonnegative and the sign of the entropy production is only determined by  $\gamma_\tau$ .

## References

1. Topsøe, F. Some Bounds for the Logarithmic Function. in: Cho, Y.J., Kim, J.K. & Dragomir, S.S., *Inequality Theory and Applications*. Nova Science Publishers, New York, 2007.
